# Supplementary material for: Identification and validation of a novel signature for prediction the prognosis and immunotherapy benefit in bladder cancer
Source: PeerJ journal article supplement (doi:10.7717/peerj.12843), 2022-01-25

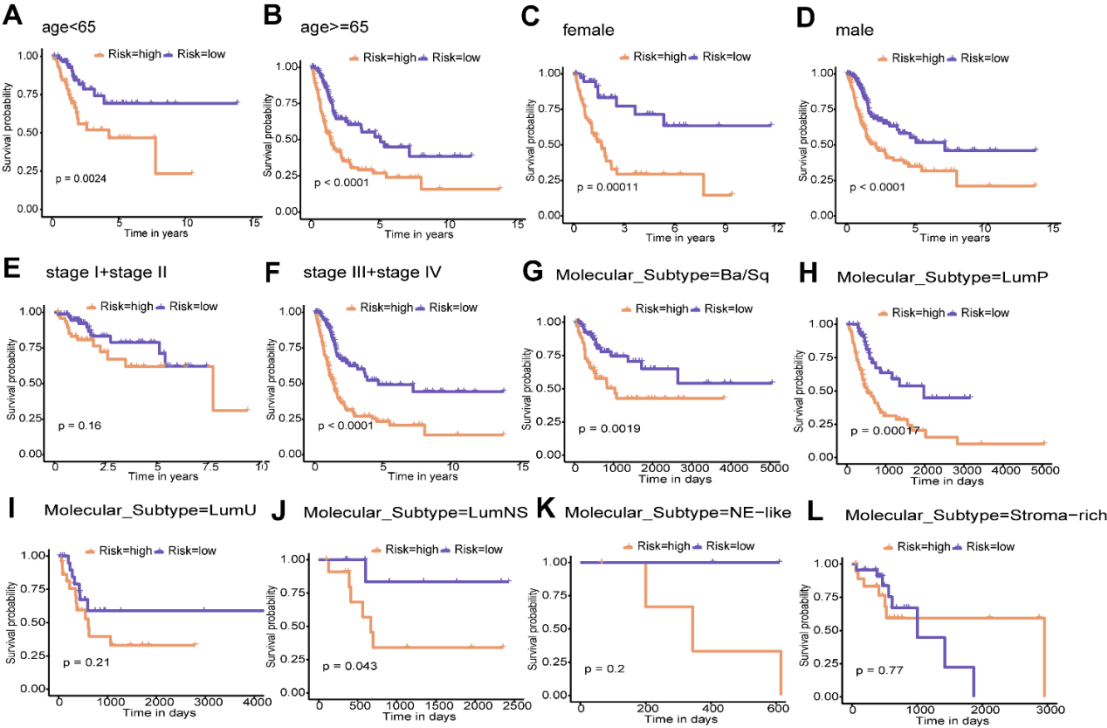

Supplement: Supplementary_Figure_1.pdf [file Supplementary_Figure_1.pdf]
