# Supplementary material for: Identification and validation of a novel signature for prediction the prognosis and immunotherapy benefit in bladder cancer
Source: PeerJ journal article supplement (doi:10.7717/peerj.12843), 2022-01-25
Supplement: Supplementary_Figure_2.pdf [file Supplementary_Figure_2.pdf]

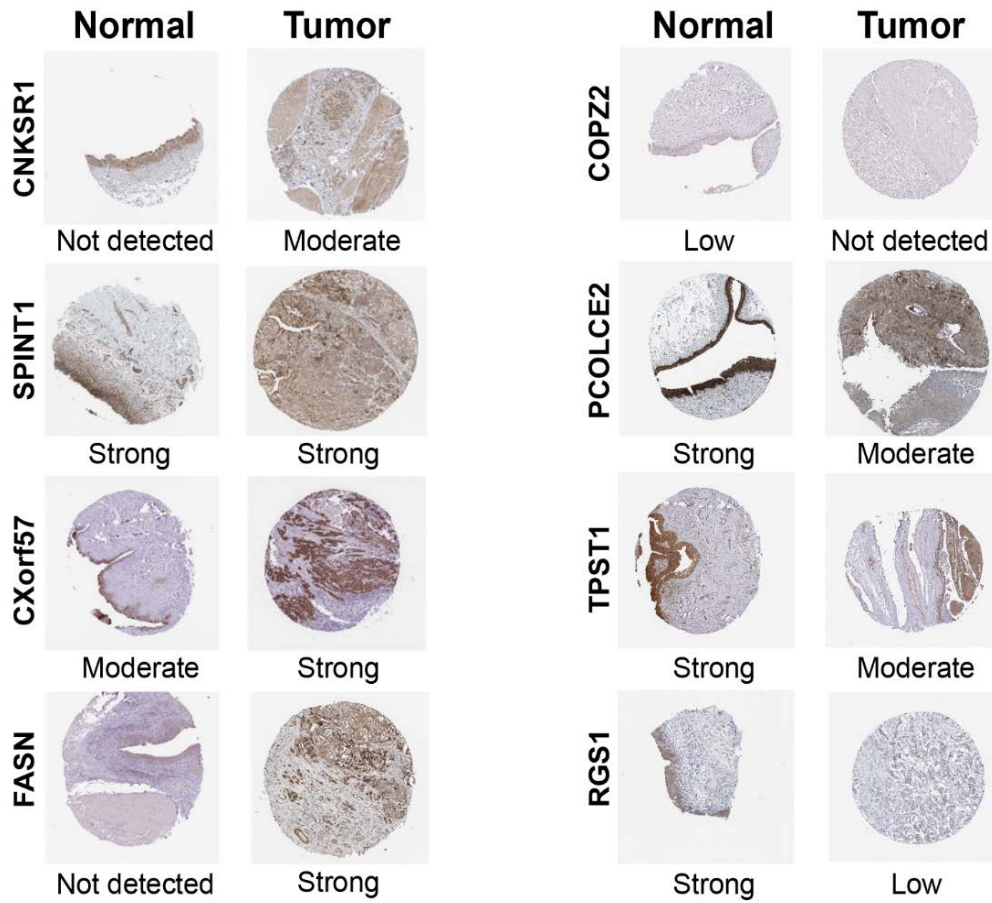

**Supplementary Figure 2. Expression levels of the eight genes in tumor tissues and normal tissues.** Images were taken from the Human Protein Atlas.
