# Supplementary material for: Identification and validation of a novel signature for prediction the prognosis and immunotherapy benefit in bladder cancer
Source: PeerJ journal article supplement (doi:10.7717/peerj.12843), 2022-01-25
Supplement: Supplementary_Figure_3.pdf [file Supplementary_Figure_3.pdf]

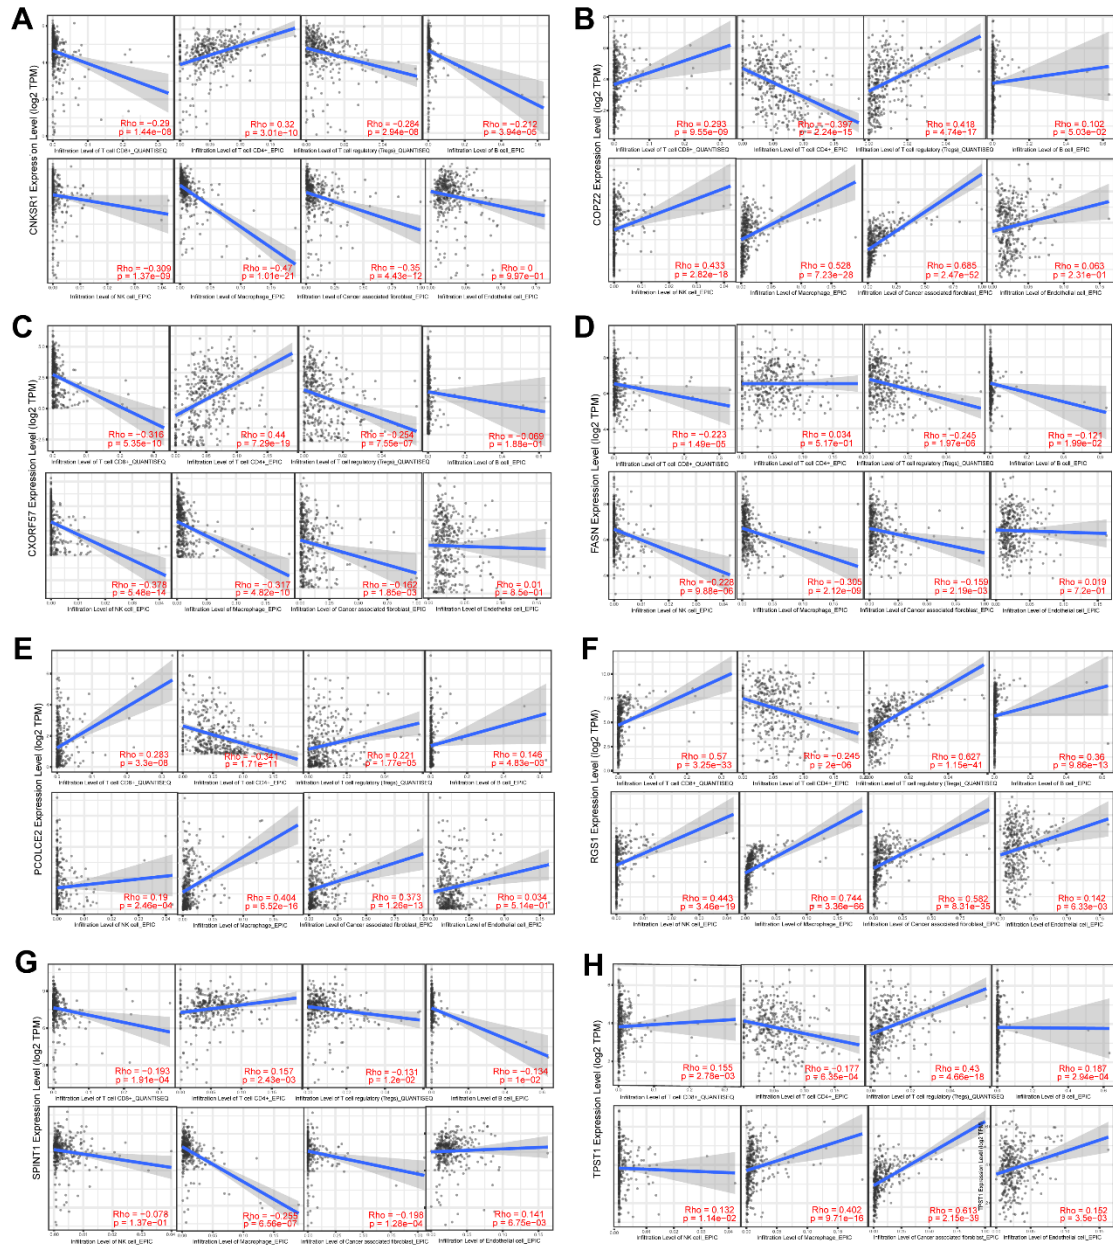

**Supplementary Figure 3. Correlation between immune infiltration level and expression of each gene in the gene signature. (A) *CNKSRI*, (B) *COPZ2*, (C) *CXorf57*, (D) *FASN*, (E) *PCOLCE2*, (F) *RGS1*, (G) *SPINT1*, (H) *TPST1***
