# Supplementary material for: Identification and validation of a novel signature for prediction the prognosis and immunotherapy benefit in bladder cancer
Source: PeerJ journal article supplement (doi:10.7717/peerj.12843), 2022-01-25

**A****CNKSR1**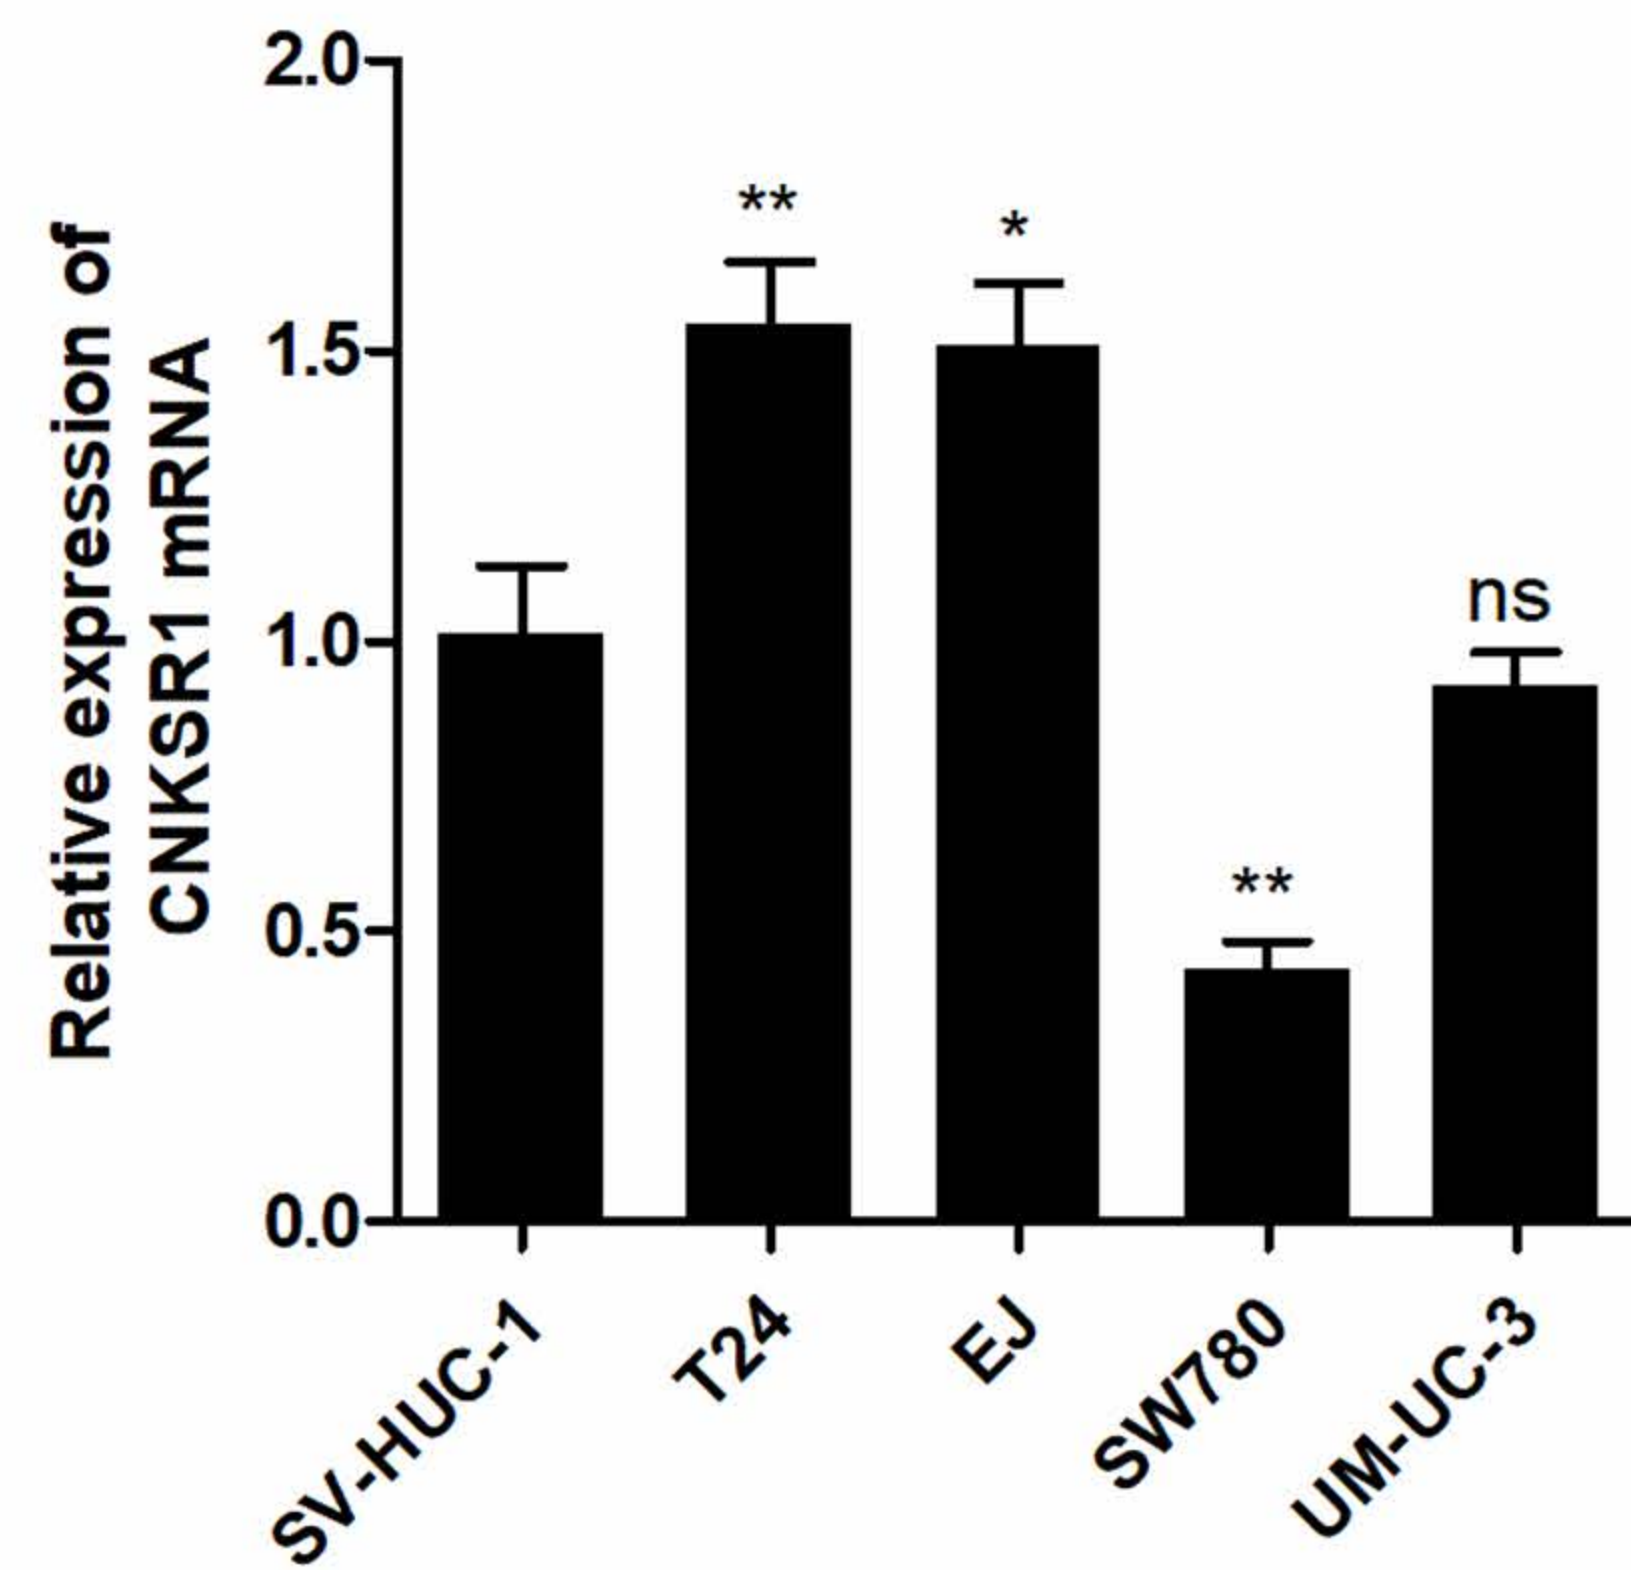**B****COPZ2**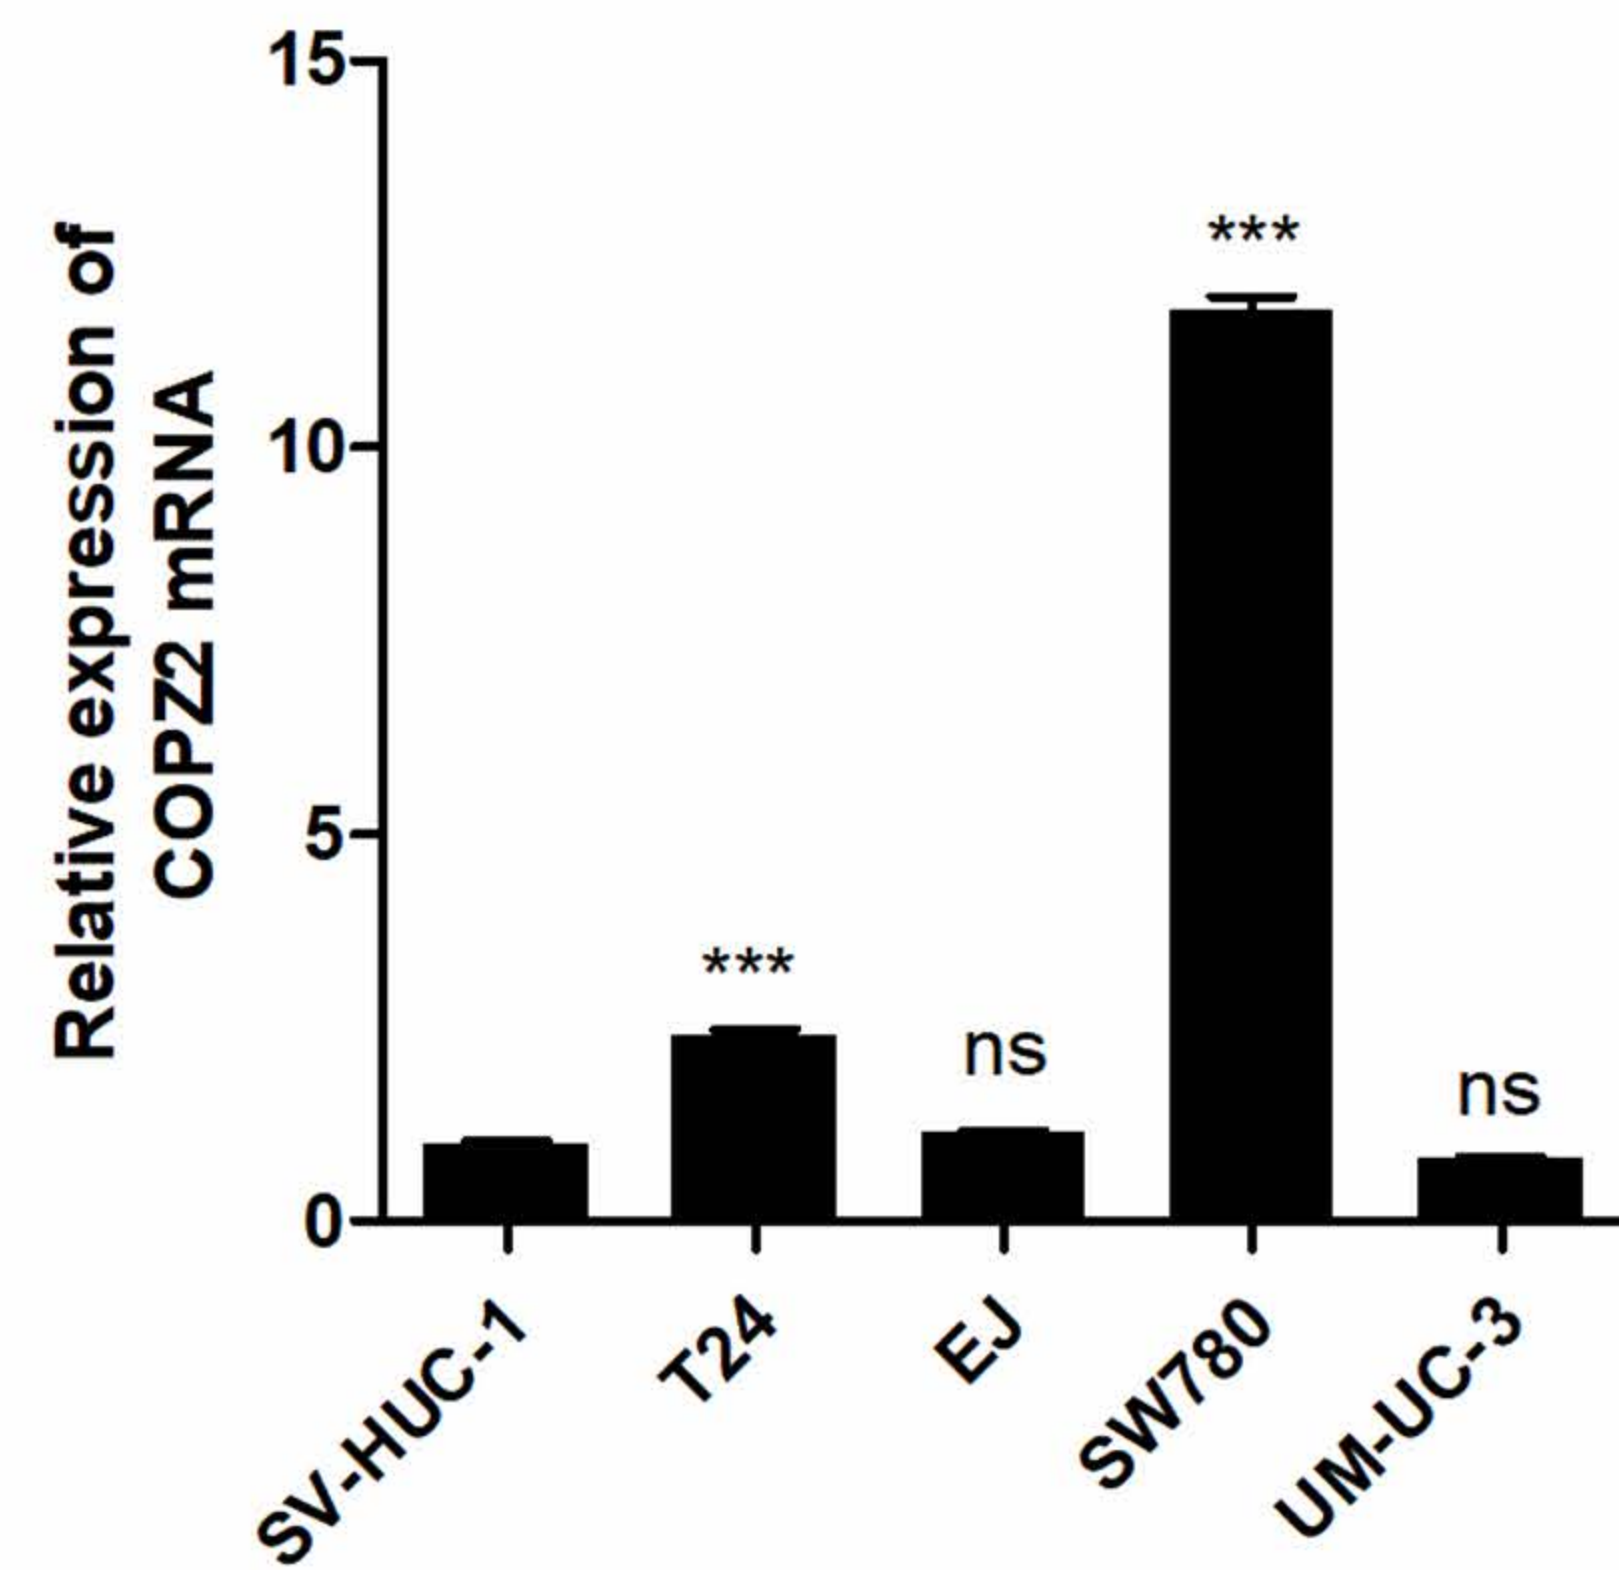**C****CXorf57**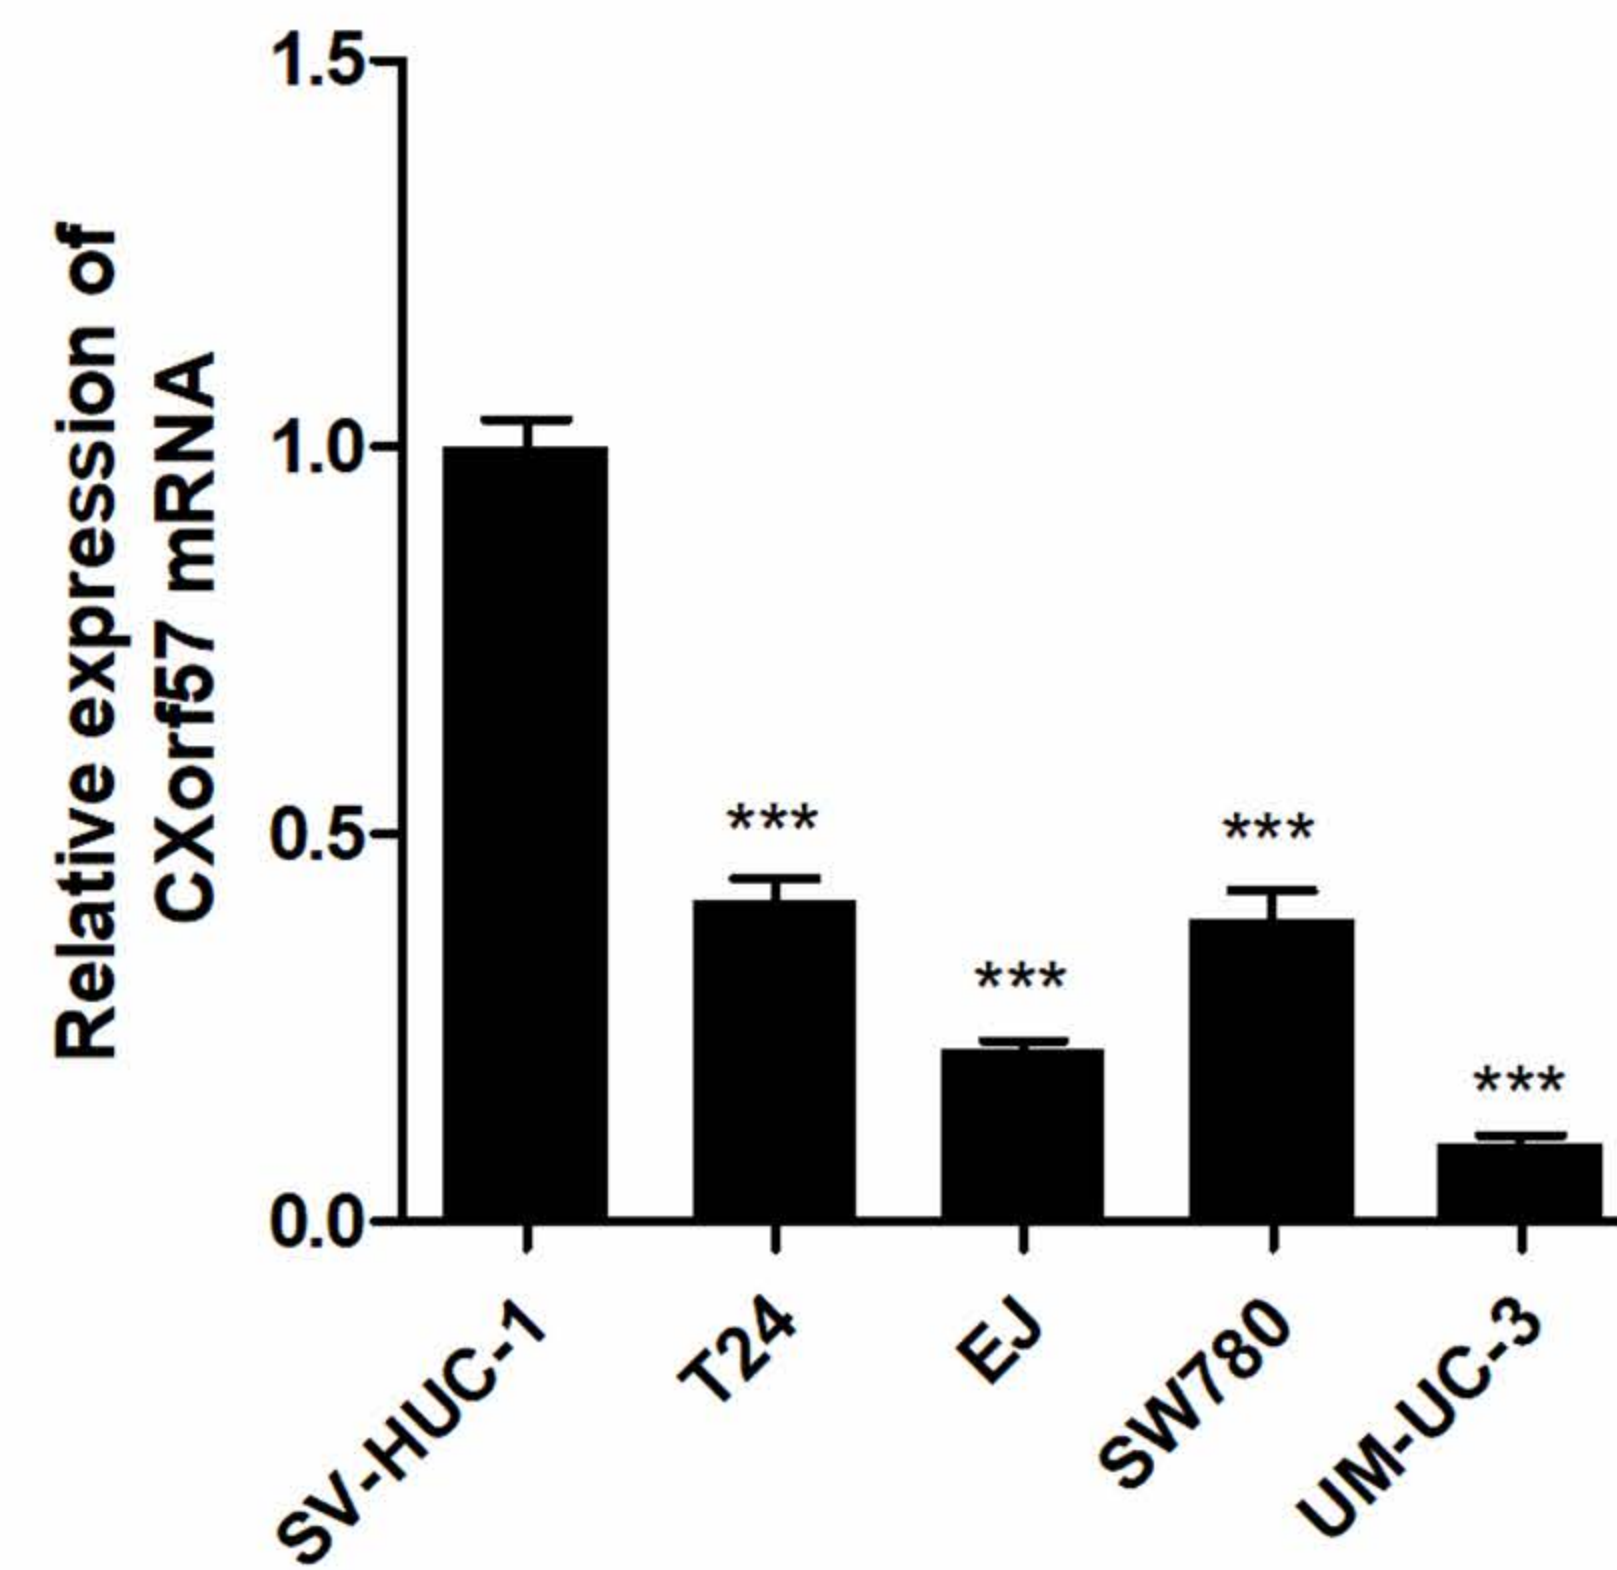**D****FASN**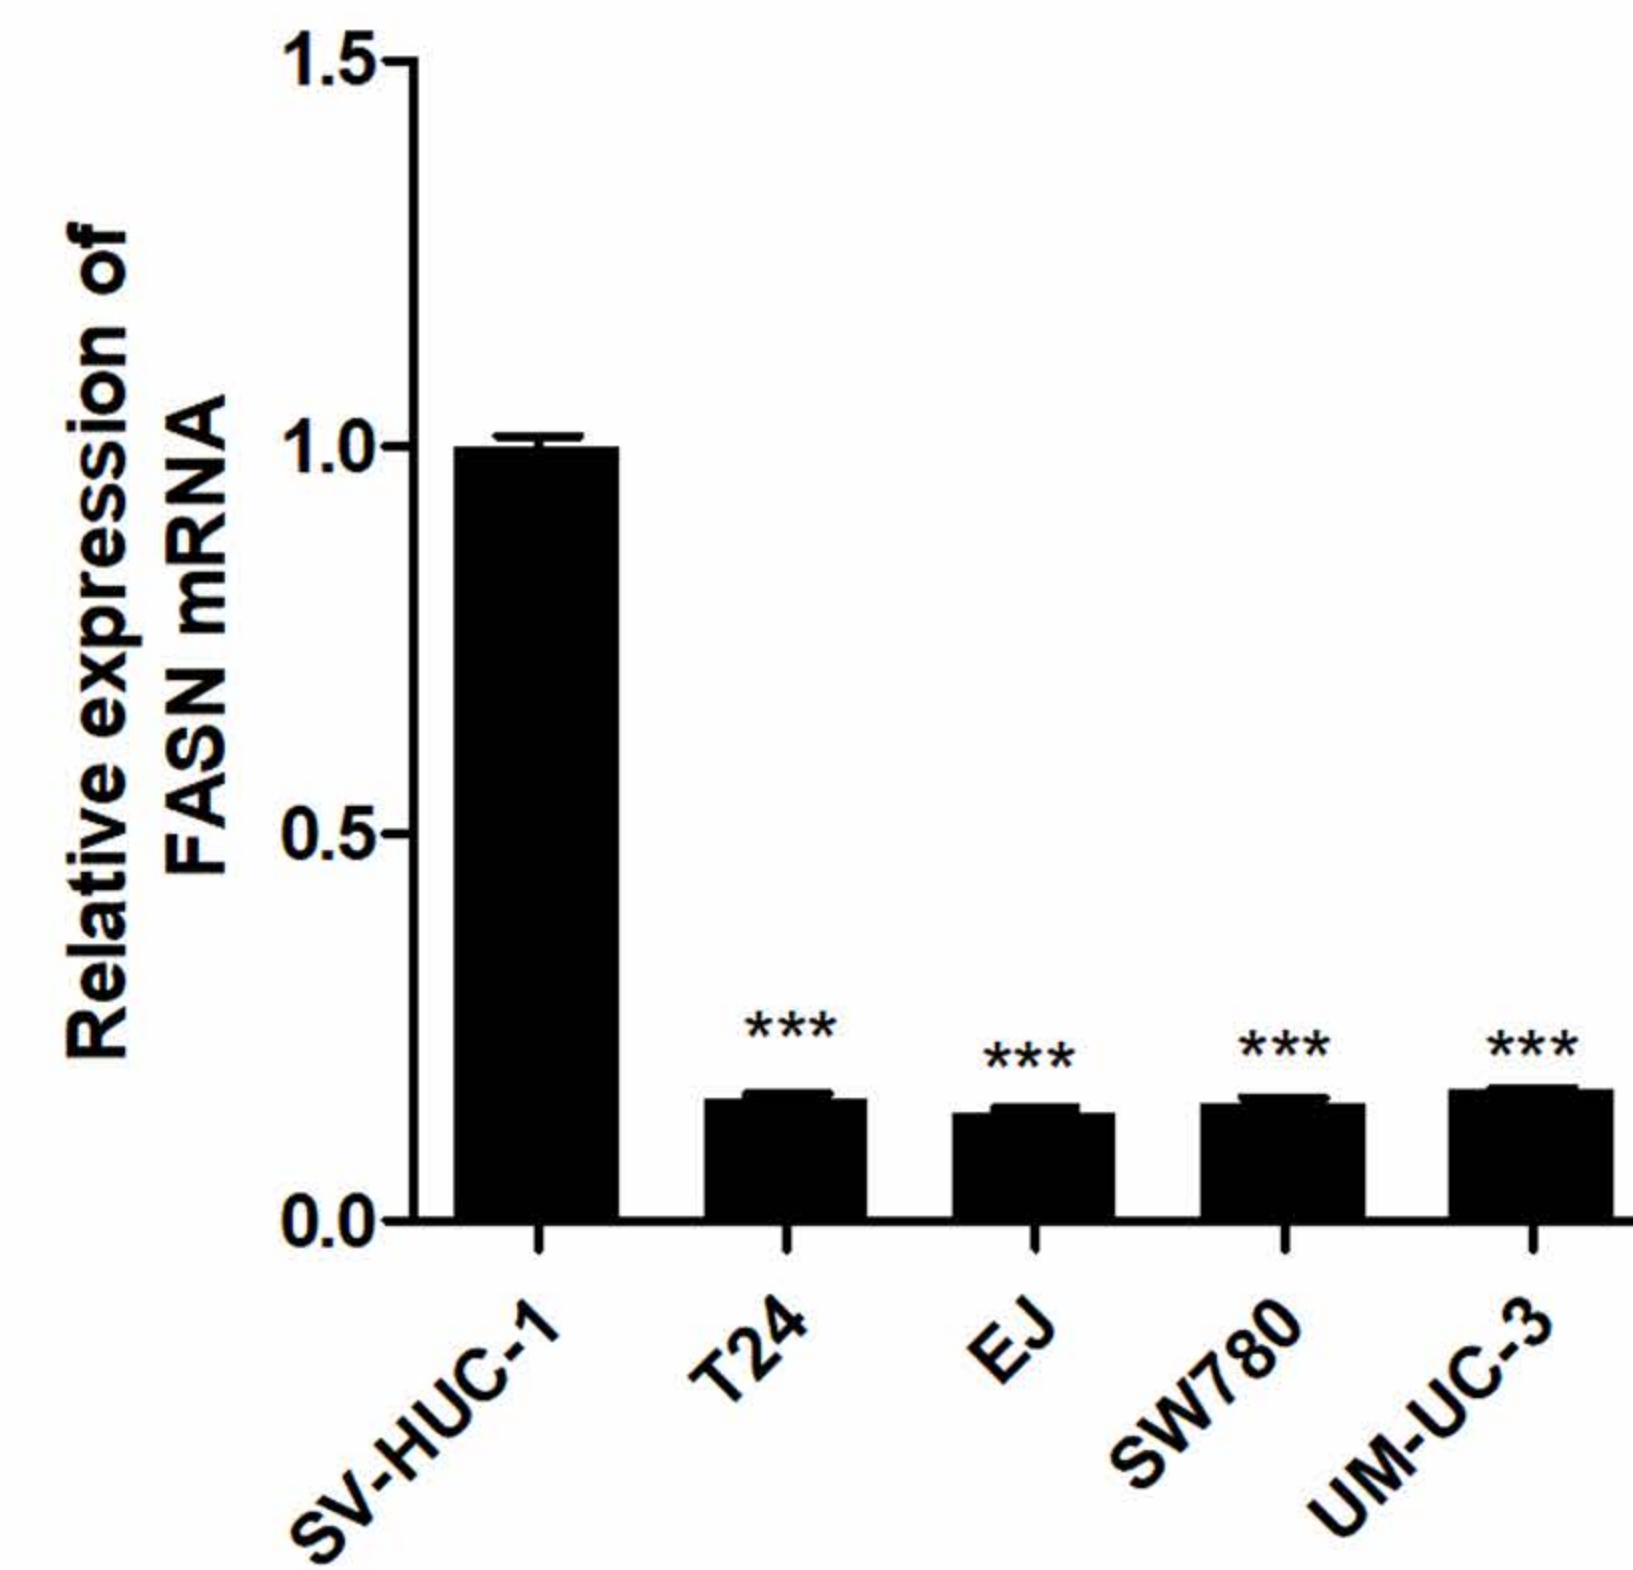**E****PCOLCE2**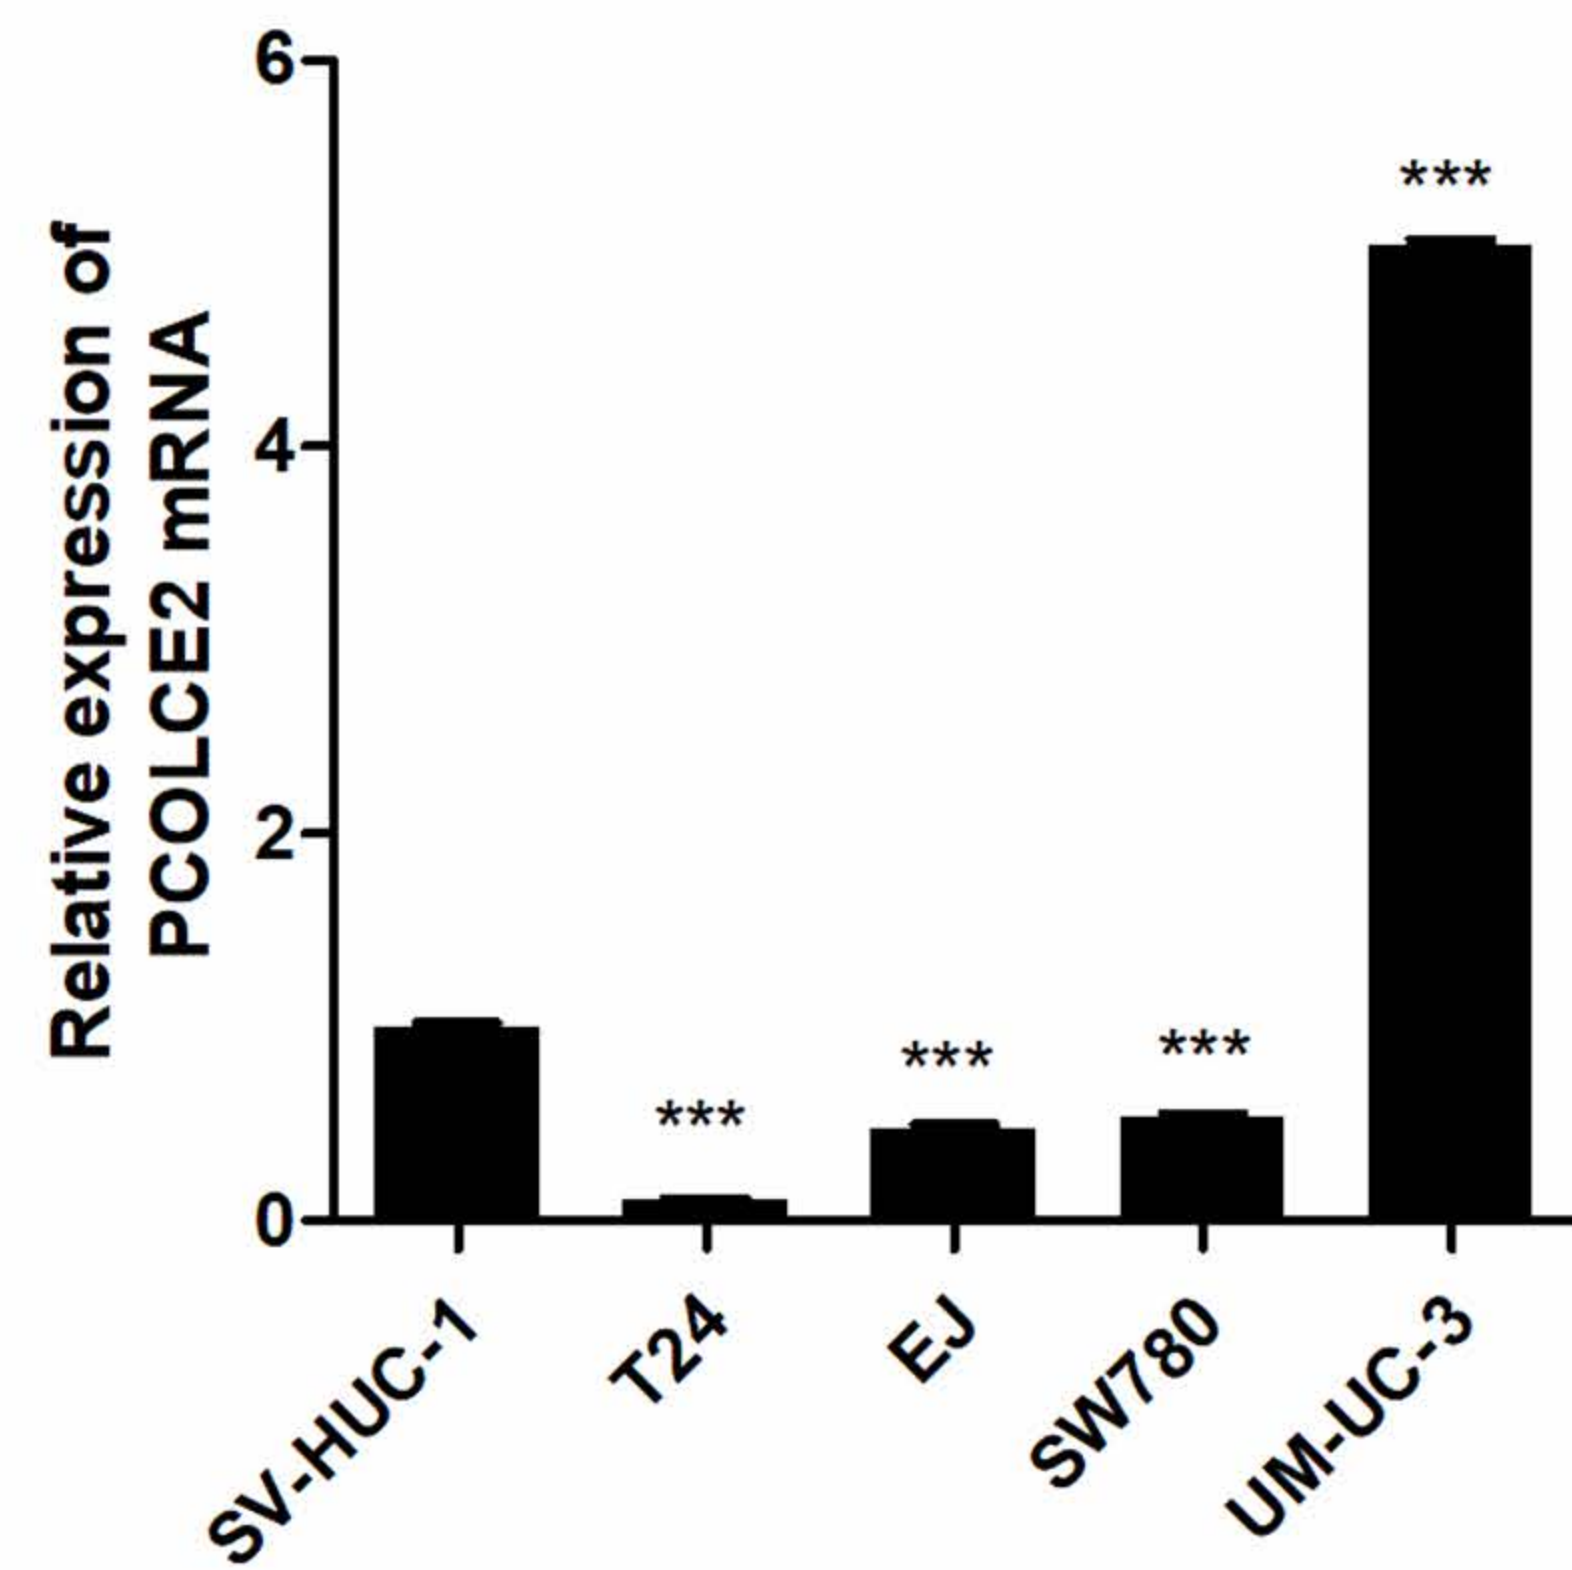**F****RGS1**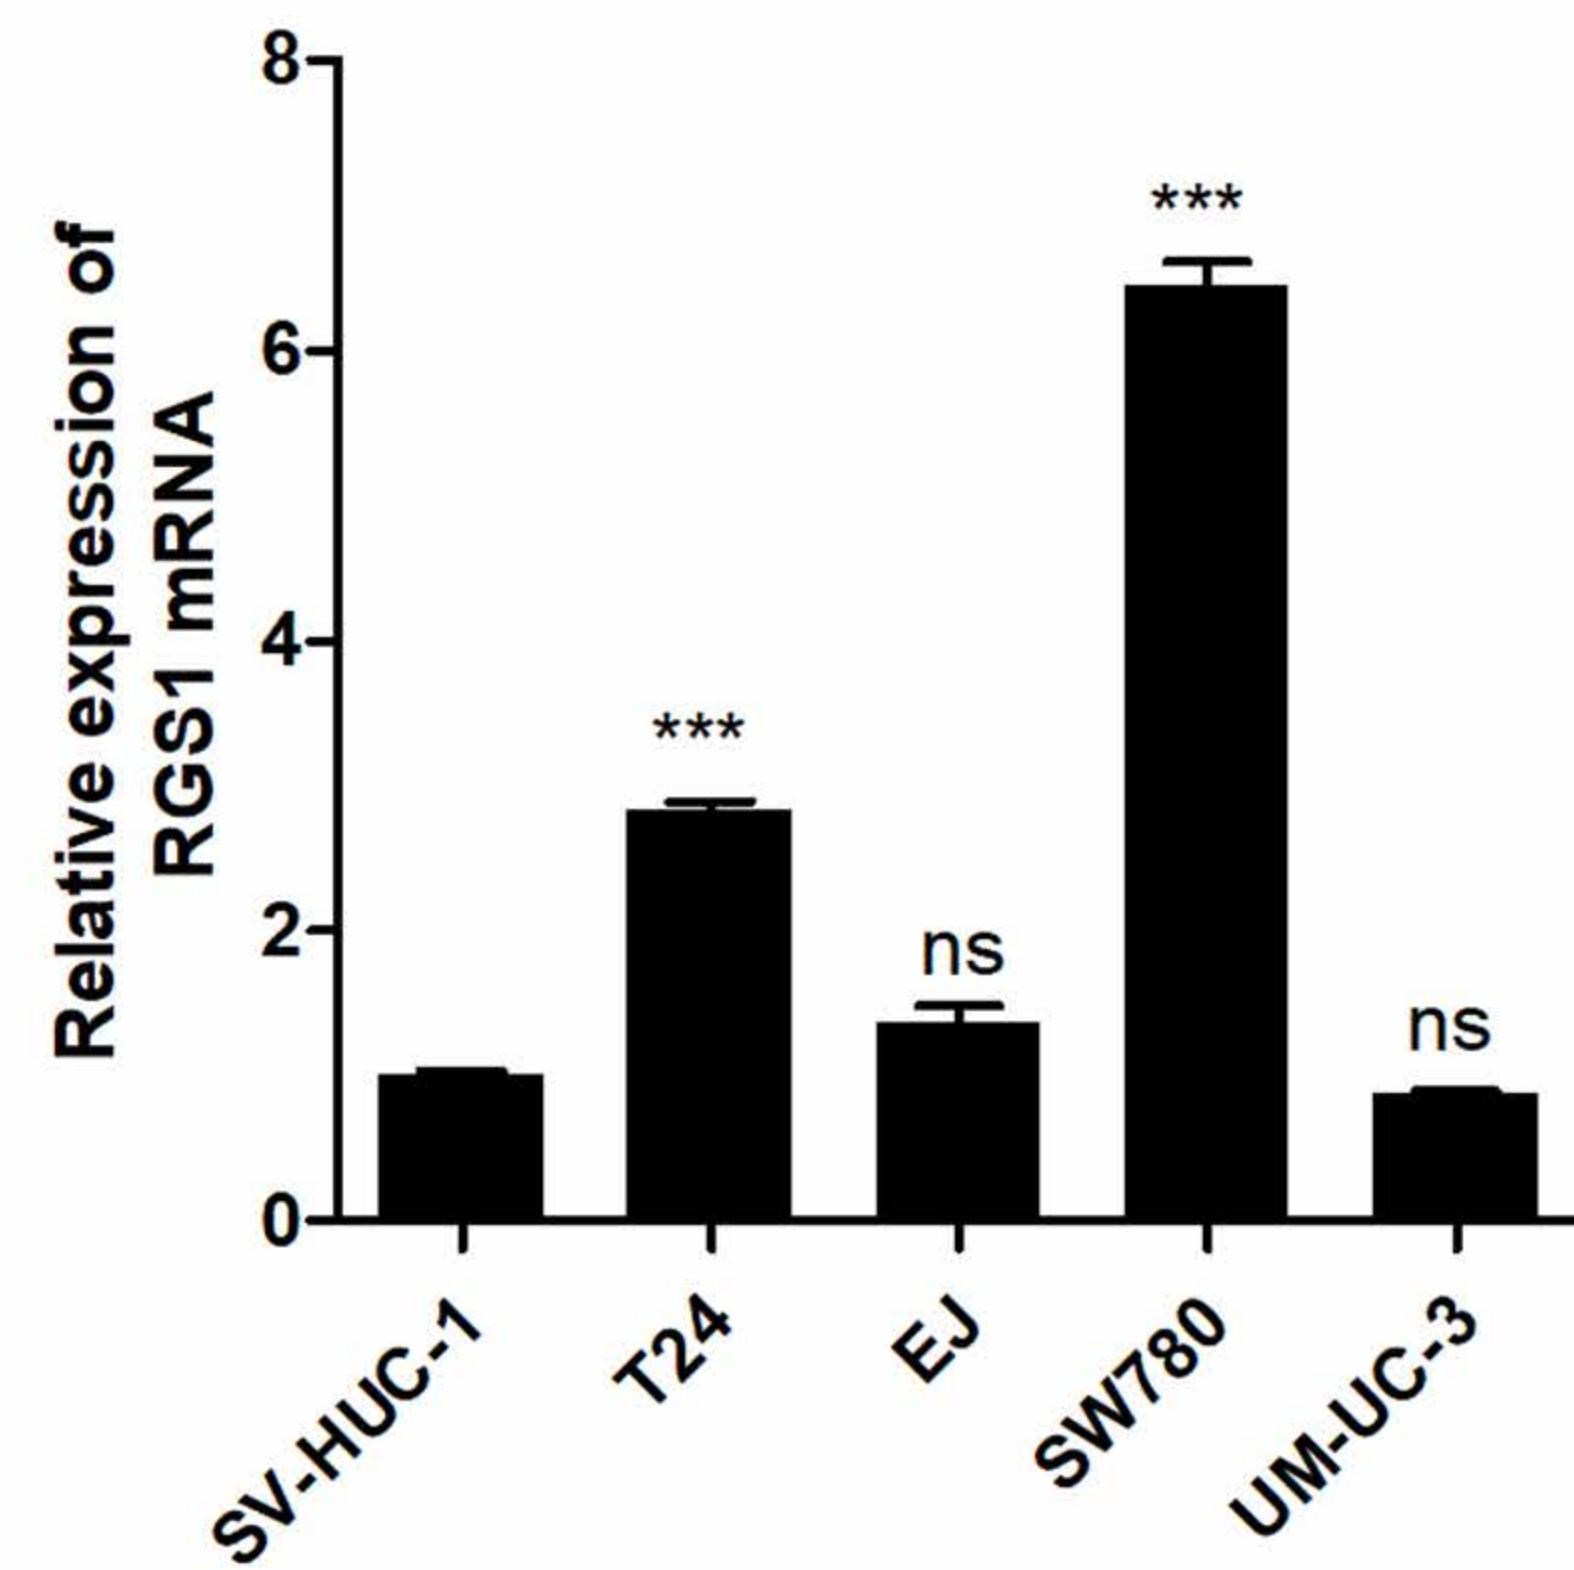**G****SPINT1**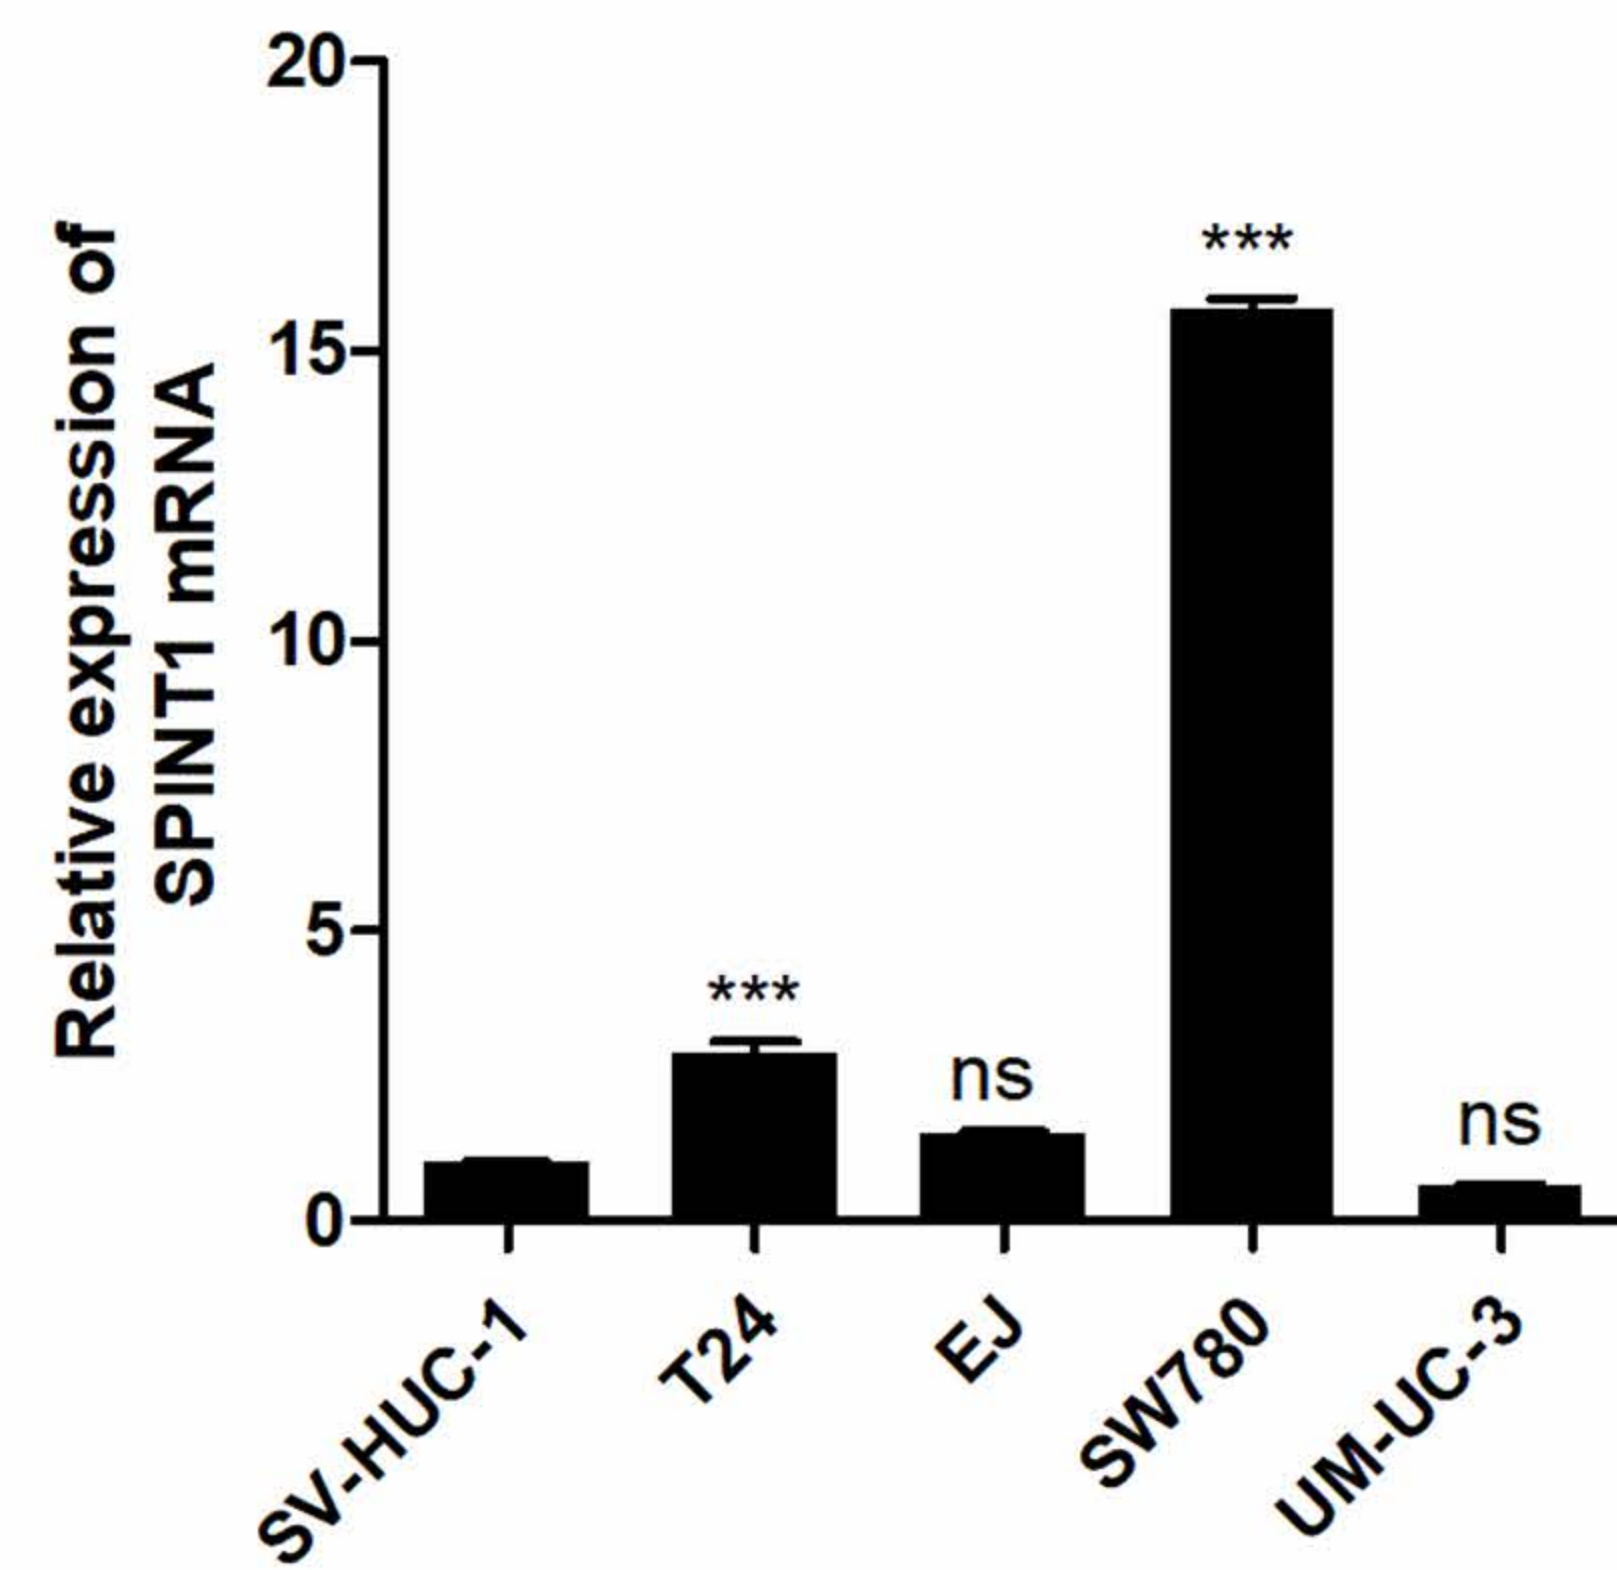**H****TPST1**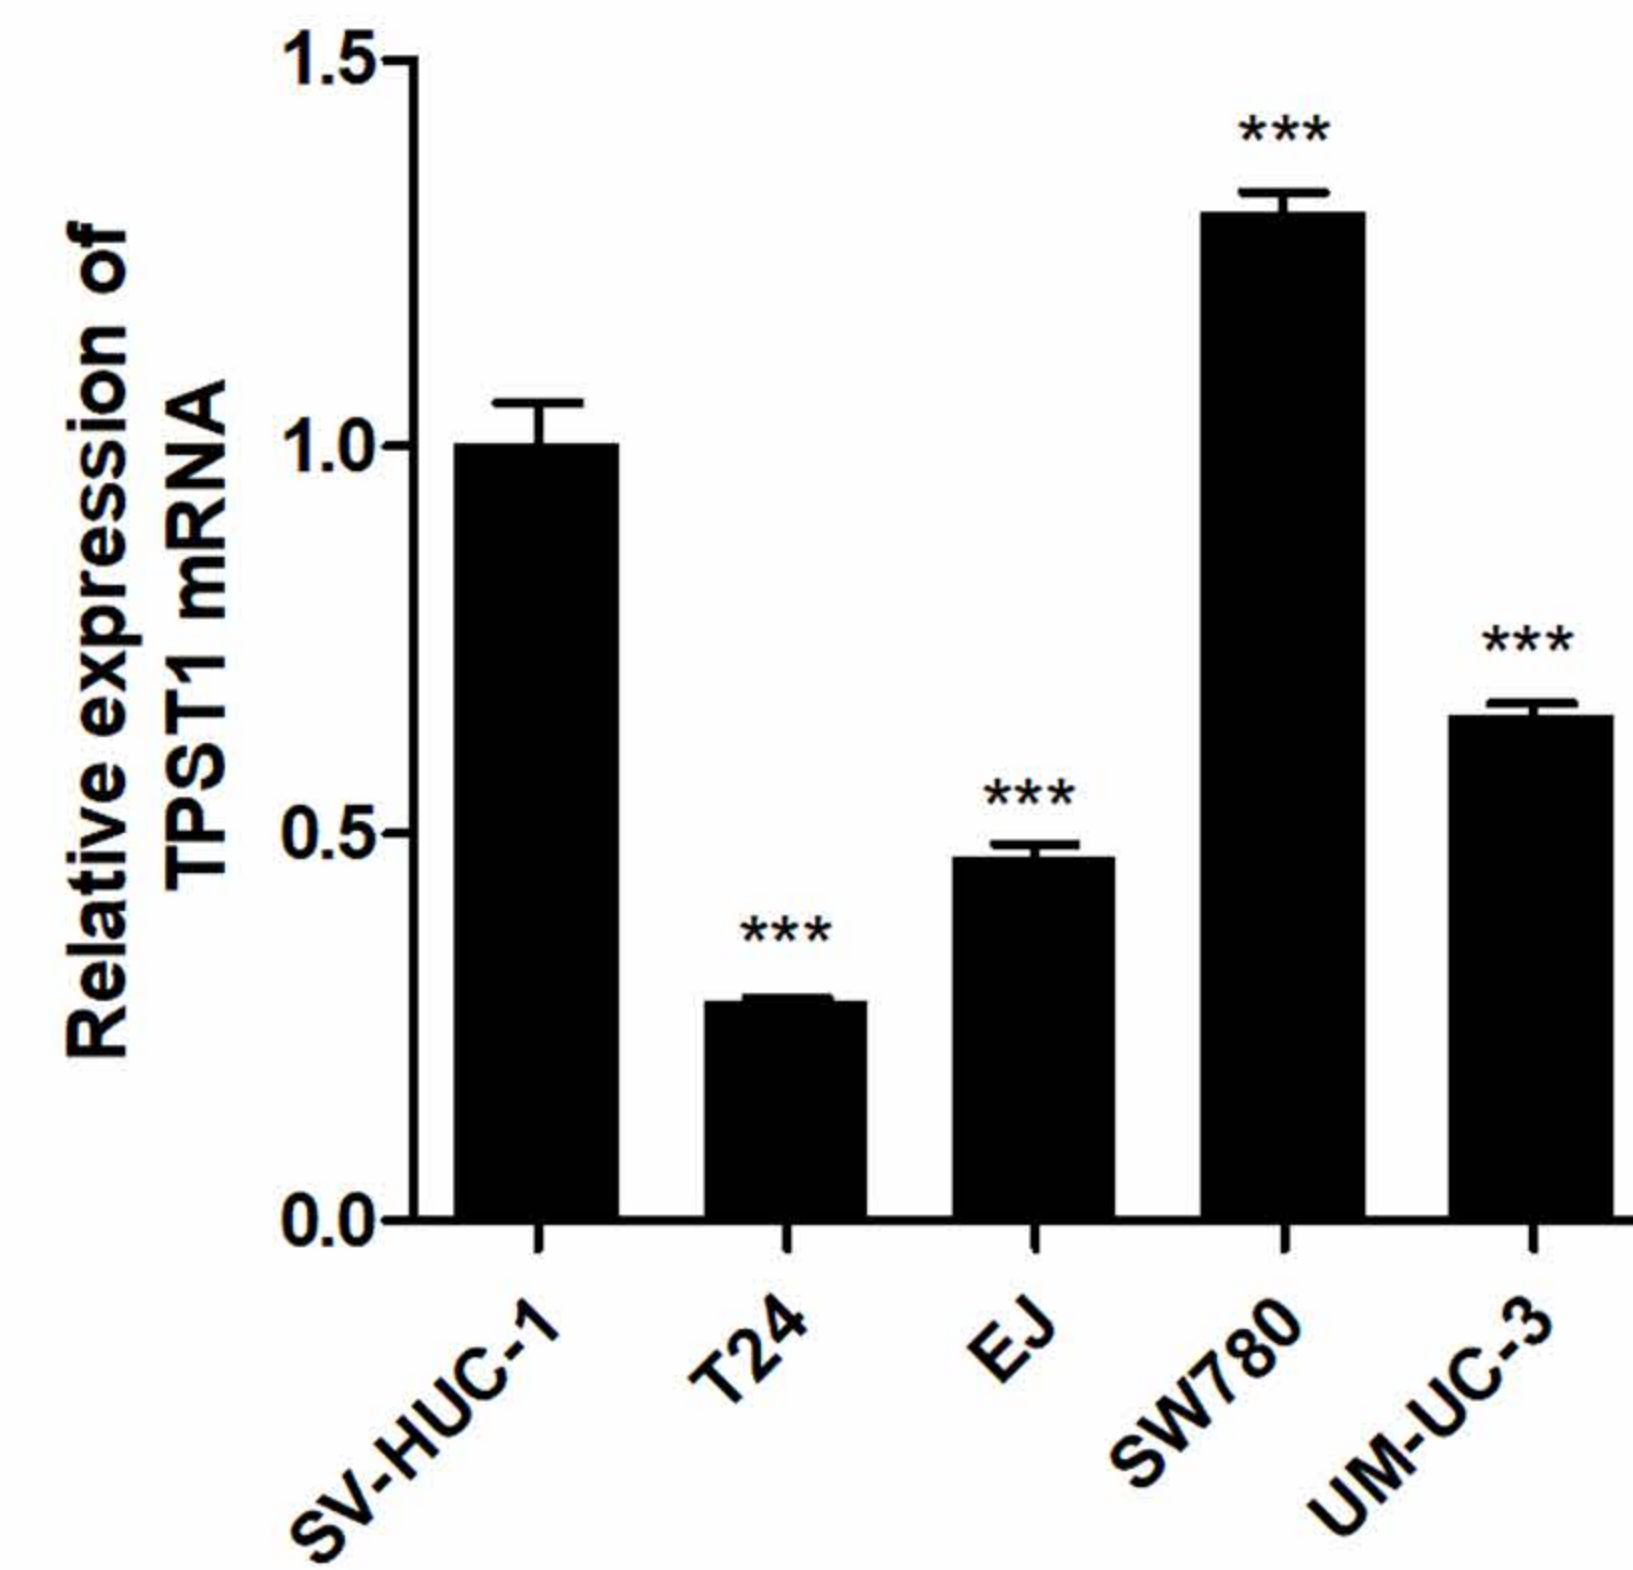

Supplement: Supplementary_Figure_4.pdf [file Supplementary_Figure_4.pdf]
